# Supplementary material for: Identification of a Biomarker Combination for Survival Stratification in pStage II/III Gastric Cancer after Curative Resection
Source: MDPI journal article supplement (doi:10.3390/cancers14184427), 2022-09-12
Supplement: s1 [file s1]

Supplementary Table S1 Univariate and multivariate analyses of clinicopathological factors and Galectin-10 expression for overall survival.

| Factors               |                 | Number<br>of patients | Univariate |           | P-Value      | Multivariate |           | P-Value      |
|-----------------------|-----------------|-----------------------|------------|-----------|--------------|--------------|-----------|--------------|
|                       |                 |                       | HR         | 95%CI     |              | HR           | 95%CI     |              |
| Age                   | ≤ 65            | 217                   | 1          |           |              | 1            |           |              |
|                       | > 65            | 230                   | 1.42       | 1.08-1.88 | <b>0.014</b> | 1.40         | 1.06-1.85 | <b>0.019</b> |
| Gender                | Female          | 134                   | 1          |           |              |              |           |              |
|                       | Male            | 313                   | 1.12       | 0.82-1.51 | 0.482        |              |           |              |
| Histological type     | Well/Moderately | 193                   | 1          |           |              |              |           |              |
|                       | Poorly          | 254                   | 1.07       | 0.81-1.41 | 0.643        |              |           |              |
| Lymphatic<br>invasion | (-)             | 132                   | 1          |           |              |              |           |              |
|                       | (+)             | 315                   | 0.96       | 0.71-1.29 | 0.780        |              |           |              |
| Venous invasion       | (-)             | 128                   | 1          |           |              |              |           |              |
|                       | (+)             | 319                   | 1.26       | 0.93-1.71 | 0.138        |              |           |              |
| pStage                | II              | 170                   | 1          |           |              | 1            |           |              |
|                       | III             | 277                   | 1.46       | 1.10-1.94 | <b>0.009</b> | 1.49         | 1.12-1.98 | <b>0.006</b> |
| Galectin-10           | Low             | 364                   | 1          |           |              | 1            |           |              |
|                       | High            | 83                    | 1.48       | 1.06-2.07 | <b>0.021</b> | 1.45         | 1.04-2.03 | <b>0.030</b> |

p, pathological; Well, Well differentiated adenocarcinoma; Moderately, Moderately differentiated adenocarcinoma; Poorly, Poorly differentiated adenocarcinoma

Supplementary Table S2 Clinicopathological data between Galectin-10 high expression group and low expression groups.

| Variables          | All patients<br>(N = 447) | Galectin-10   |               | P-value      |
|--------------------|---------------------------|---------------|---------------|--------------|
|                    |                           | High (N = 83) | Low (N = 364) |              |
| Age                | ≤ 65                      | 30 (36.1)     | 187 (51.4)    | <b>0.015</b> |
|                    | > 65                      | 53 (63.9)     | 177 (48.6)    |              |
| Gender             | Male                      | 59 (71.1)     | 254 (69.8)    | 0.895        |
|                    | Female                    | 24 (28.9)     | 110 (30.2)    |              |
| Histological type  | Well/Moderately           | 44 (53.0)     | 149 (40.9)    | 0.05         |
|                    | Poorly                    | 39 (47.0)     | 215 (59.1)    |              |
| Lymphatic invasion | (-)                       | 25 (30.1)     | 107 (29.4)    | 0.895        |
|                    | (+)                       | 58 (69.9)     | 257 (70.6)    |              |
| Venous invasion    | (-)                       | 21 (25.3)     | 107 (29.4)    | 0.503        |
|                    | (+)                       | 62 (74.7)     | 257 (70.6)    |              |
| pStage             | II                        | 33 (39.8)     | 137 (37.6)    | 0.709        |
|                    | III                       | 50 (60.2)     | 227 (62.4)    |              |

p, pathological; Well, Well differentiated adenocarcinoma; Moderately, Moderately differentiated adenocarcinoma; Poorly, Poorly differentiated adenocarcinoma

Supplementary Table S3 ROC analysis of the combination of survival risk-stratification marker expression.

| IHC of PDGFRB, INHBA,<br>MMP11, and Galectin-10 | AUC   | 95% CI        |
|-------------------------------------------------|-------|---------------|
| 0 marker vs 1-4 markers                         | 0.519 | 0.473 - 0.565 |
| 0-1 marker vs 2-4 markers                       | 0.515 | 0.485 - 0.545 |
| 0-2 markers vs 3-4 markers                      | 0.504 | 0.495 - 0.512 |
| 0-3 markers vs 4 markers                        | -     | -             |

| IHC of SPARC, INHBA,<br>MMP11, and Galectin-10 | AUC   | 95% CI        |
|------------------------------------------------|-------|---------------|
| 0 marker vs 1-4 markers                        | 0.523 | 0.494 - 0.551 |
| 0-1 marker vs 2-4 markers                      | 0.527 | 0.482 - 0.571 |
| 0-2 markers vs 3-4 markers                     | 0.509 | 0.486 - 0.532 |
| 0-3 markers vs 4 markers                       | 0.502 | 0.498 - 0.506 |

IHC, Immunohistochemistry; AUC, area under curve; CI, confidence interval

Supplementary Table S4 Clinicopathological data between risk stratification markers high group and low groups.

| Variables          | All patients<br>(N = 447) | Risk stratification by<br>PDGFRB, MMP11, INHBAG, and Galectin-10 |                  | P-value      |
|--------------------|---------------------------|------------------------------------------------------------------|------------------|--------------|
|                    |                           | High (2-4 markers)                                               | Low (0-1 marker) |              |
| Age                | ≤65                       | 21 (39.6)                                                        | 196 (49.7)       | 0.189        |
|                    | >65                       | 32 (60.4)                                                        | 198 (50.3)       |              |
| Gender             | Male                      | 42 (79.2)                                                        | 271 (68.8)       | 0.150        |
|                    | Female                    | 11 (20.8)                                                        | 123 (31.2)       |              |
| Histological type  | Well/Moderately           | 34 (64.2)                                                        | 159 (40.4)       | <b>0.002</b> |
|                    | Poorly                    | 19 (35.8)                                                        | 235 (59.6)       |              |
| Lymphatic invasion | (-)                       | 13 (24.5)                                                        | 119 (30.2)       | 0.428        |
|                    | (+)                       | 40 (75.5)                                                        | 275 (69.8)       |              |
| Venous invasion    | (-)                       | 8 (15.1)                                                         | 120 (30.5)       | <b>0.023</b> |
|                    | (+)                       | 45 (84.9)                                                        | 274 (69.5)       |              |
| pStage             | II                        | 19 (35.8)                                                        | 151 (38.3)       | 0.765        |
|                    | III                       | 34 (64.2)                                                        | 243 (61.7)       |              |

p, pathological; Well, Well differentiated adenocarcinoma; Moderately, Moderately differentiated adenocarcinoma; Poorly, Poorly differentiated adenocarcinoma
